# Supplementary material
Source: PubMed Central journal article supplement (PMC3433779)

## SUPPLEMENTARY MATERIALS AND METHODS

### Chromatin Immunoprecipitation for qPCR analysis

Four different active promoter genes were chosen, ATXN7L2, PSRC1, CELSR2 and IL24, all located on chromosome 1. Primer sequences are shown in the table below.

| Gene name              | Sequence forward primer | Sequence reverse primer |
|------------------------|-------------------------|-------------------------|
| ATXN7L2                | CCTCCCTGCACCTACCCTAT    | TCCACTCTCCCAAGCTCACT    |
| PSRC1                  | ACCGTGATTGGTGAATCCTC    | CTCTGCTCCCATCTGCCTAC    |
| CELSR2                 | TGCAACTGTGATGTCAGCAA    | CACAAGGCCCTCAGCTCTAC    |
| IL24                   | AGCCAGTGGTAGAGCCTGAA    | AGGAAAAAGAGGGAGGTGGA    |
| Non-transcribed region | CCCATCTCAACCTCCACACT    | CTTGTCCAGATTTCGCTGTGA   |

### Chromatin Immunoprecipitation

Chromatin was prepared as described in Fousteri et al. (Fousteri et al, 2006) from untreated XPCS2\_SV40 cells or 30 min after global UVC irradiation (16 J/m<sup>2</sup>). Sonication was performed on ice in a buffer containing 10 mM Tris-HCl [pH 8.0], 140 mM NaCl, 1% Triton X-100, 0.1% Na-deoxycholate, 0.1% SDS (buffer S). The sonicator was a Diagenode (Liège, Belgium) Bioruptor set at power 5 and cycles were: 10 s pulses followed by 20 s of cooling during 15 min and repeated 3 times. After spinning down (13200 rpm, 15 min) the samples, the supernatant containing the crosslinked chromatin was stored at -80°C. In each ChIP assay, 400 µg of protein from crosslinked chromatin was used to immunoprecipitate with 1 µg of antibody rabbit IgG polyclonal anti-XPB (S-19) in buffer S. Immunoprecipitation lasted was performed at 4°C for 2 hr. The immunocomplexes were collected by adsorption to protein G Sepharose beads (Upstate-Millipore) overnight at 4°C. The G Sepharose beads were washed with 5 vol of buffer S and resuspended in 1x Laemli SDS buffer. To decrosslink the proteins prior electrophoresis, samples were incubated at 95°C for 90 min. ChIP complexes were resolved by SDS-PAGE and

western-blotted with the following NER antibodies: IgG polyclonal anti-XPB (S-19), mouse IgG monoclonal anti-p62 (G-10), goat IgG polyclonal anti-p34 (C-19), rabbit IgG polyclonal anti-XPA (FL-273, Santa Cruz Biotechnology), mouse IgG monoclonal anti-XPF (Ab-1, clone 219, ThermoScientific).

### **Measurements of transcription activity after inhibition by $\alpha$ -amanitin**

Cells (MRC5SV, XPCS2SV, XP12ROSV, XP6BESV, XPCS1ROSV) were grown on 24 mm coverslips and treated 6h or 16h with  $\alpha$ -amanitin with concentrations ranging from 0 to 25  $\mu$ g/ml at 37°C. RNA production was detected using the Click-iT RNA Alexa Fluor Imaging kit (Invitrogen). Briefly, cells were incubated for 2 hours with 5-ethynyl uridine, fixed with paraformaldehyde 4% and permeabilized with Triton 0.5%. After this treatment, cells were incubated for 30 min with the Click-iT reaction cocktail containing Alexa Fluor Azide 488. After washing, coverslips were mounted on slides with Vectashield (Vector). Imaging was performed on a Zeiss LSM 710 confocal laser scanning microscope (Zeiss), using a 40x/1.3 objective.

### **SUPPLEMENTARY REFERENCES**

Fousteri M, Vermeulen W, van Zeeland AA, Mullenders LH (2006) Cockayne syndrome A and B proteins differentially regulate recruitment of chromatin remodeling and repair factors to stalled RNA polymerase II in vivo. *Mol Cell* **23**: 471-482

## **SUPPLEMENTARY FIGURE LEGENDS**

### **Figure S1: Recruitment of the DNA damage response machinery is not pan-nuclear in XP-D/CS cells.**

(A) Local H2AX phosphorylation in XPCS2 (XP-D/CS) cells after UV exposure. XP-D/CS cells were treated with 60 J/m<sup>2</sup> local UV-irradiation. 45 minutes later the cells were fixed and immunostained with antibodies directed against  $\gamma$ H2AX (Ser139) (in red) and the XPB protein (in green). (B) Local H2A ubiquitination (in red) and the XPB protein (in green) in XP-D/CS cells 45 minutes after local UV-irradiation. All scale bars, 5  $\mu$ m.

### **Figure S2: Effect of UVC-irradiation on TFIIH binding at promoters in WT and XP-D/CS cells**

Bar graphs of the qPCR data from the Chromatin Immunoprecipitation (ChIP) experiments on the promoters of 4 different expressed genes in both MRC5 (WT) and XPCS2 (XP-D/CS) cells, prior to (-UV) and 1/2h after exposure to 20 J/m<sup>2</sup> of UVC (+UV) . The Y-axis represents the fold enrichment of TFIIH binding to the promoter region of each active gene.

### **Figure S3: Transcription inhibition by alpha-amanitin treatment**

Confocal images of WT, XP-D/CS, XP-G/CS, XP-A and XP-D cells treated with different concentrations (from 5  $\mu$ g/ml to 20  $\mu$ g/ml) of  $\alpha$ -amanitin for 6h. RNA production is stained in green using the EU Click it kit. All scale bars, 25  $\mu$ m.

**Figure S4: UVC-irradiation does not induce DNA breaks in XP-D/CS cells at early time points.**

(A) Confocal images of XPB (red), Ku80 (green) and Poly(ADP-ribose) (green) immunostaining in XP-D/CS cells fixed 15 min (top row) and 1 hour (bottom row) after local UV-irradiation (60 J/m<sup>2</sup>). (B) Confocal images of XPB (red), Ku80 (green) and Poly(ADP-ribose) (green) immunostaining in XP-D/CS cells fixed 15 min after laser induced (multi-photon at 800nm) DNA damage. All scale bars, 5  $\mu$ m.

**Figure S5: H2AX phosphorylation in primary cells after UV-irradiation.**

(A) Immunostaining with DAPI (cyan) and Ki67 (green) in confluent XP-D/CS human primary cells. Less than 10% of the cells were Ki67 positive (counting  $\geq 200$  nuclei). Scale bars, 25  $\mu$ m.

(B) Confocal images of  $\gamma$ H2AX (green) and XPB (red) immunofluorescence in confluent primary human cells (C5RO, XPCS2, XPCS1RO and XP12RO) 1h after local UV-irradiation (60 J/m<sup>2</sup>). Scale bars, 5  $\mu$ m.

**Figure S6: RPA accumulation in UVC-exposed areas in primary cells and XPF recruitment into repair complexes**

(A) Confocal images of RPA (green) and XPB (red) immunofluorescence in confluent primary human cells (C5RO, XPCS2 and XPCS1RO) 1h after local UV-irradiation (60 J/m<sup>2</sup>). Scale bars, 5  $\mu$ m. (B) Western-blot analysis of XPB-specific ChIP using chromatin of crosslinked UV-irradiated (lane 2) and untreated (lane 1) TFIIH<sup>XP/CS</sup> cells. ChIP complexes were resolved by SDS-PAGE and western-blotted with NER antibodies (indicated by arrows). The thick-bands (indicated by \*) are heavy and light chain IgG bands, intrinsic to the IP.

**Figure S7: ssDNA labeling after high local UV-irradiation.**

Confocal images of XPB (red) and BrdU (green) immunofluorescence in MRC5 (WT) and XPCS2 (XP-D/CS) cells 1h after local UV-irradiation (100 J/m<sup>2</sup>). Scale bars, 5 μm.

**Figure S8: XPF depletion 48 h after siRNA α-XPF treatment.**

Confocal images of XPB (red) and XPF (green) immunofluorescence in XP-D/CS cells, 1h after UV local exposure with 60 J/m<sup>2</sup>. Cells were transfected with 40 nM siRNA α-XPF, or not (Mock), 48 h prior the experiment. Scale bars, 20 μm.

**Figure S9: Fen1 accumulation on UV-lesion sites only in XP/CS cells.**

Confocal images of Fen1 (red) and RPA (green) immunostained cells (WT, XP-D/CS, XP-G/CS and XP-A) 1 h after local UV-irradiation (60 J/m<sup>2</sup>). Scale bars, 5 μm.

SUPPLEMENTARY FIGURES

Supplementary Figure S1 Godon et al.

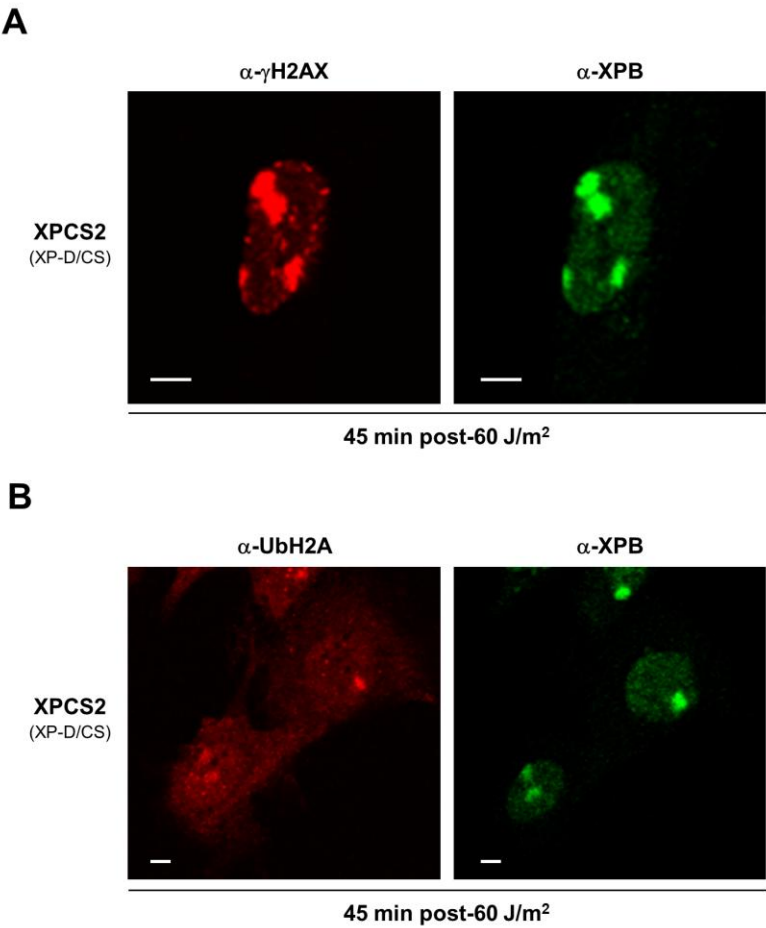

Supplementary Figure S2 Godon et al.

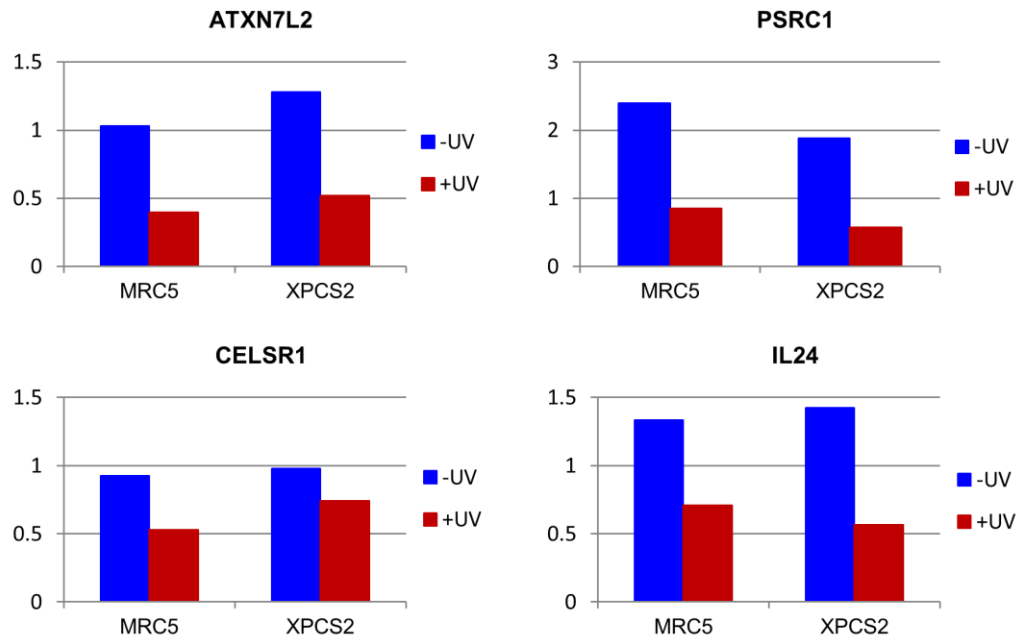

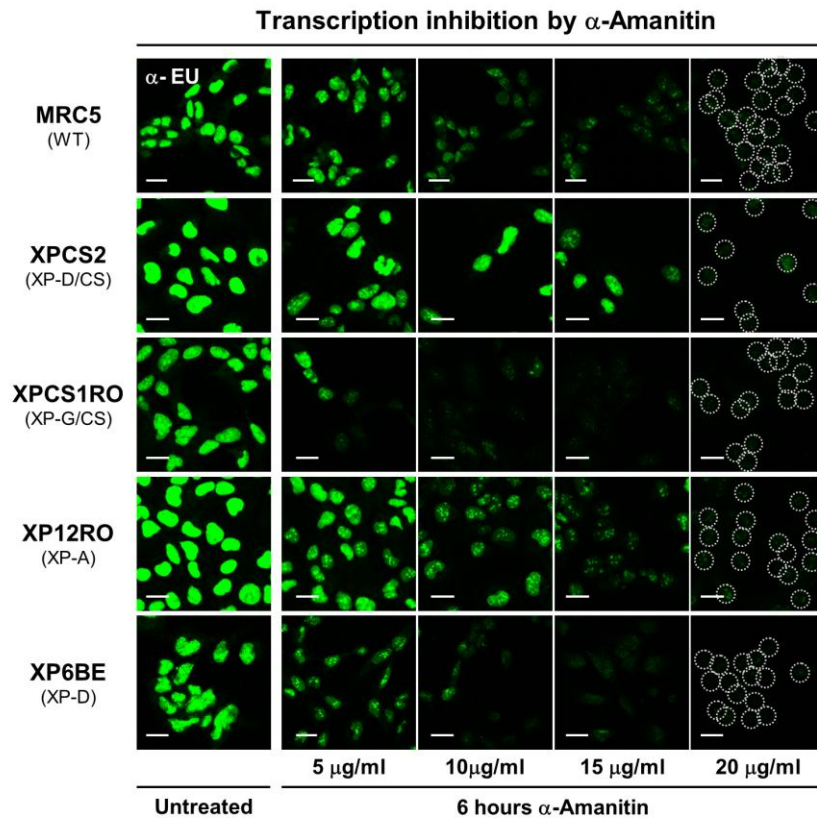

**A**

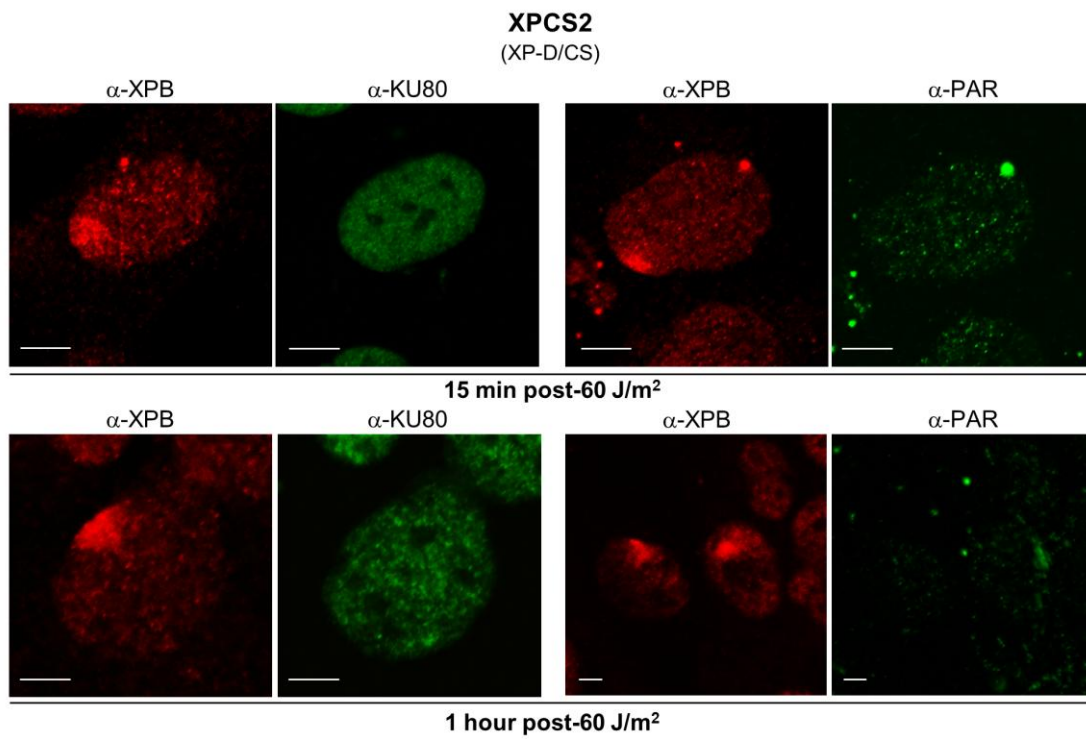

**B**

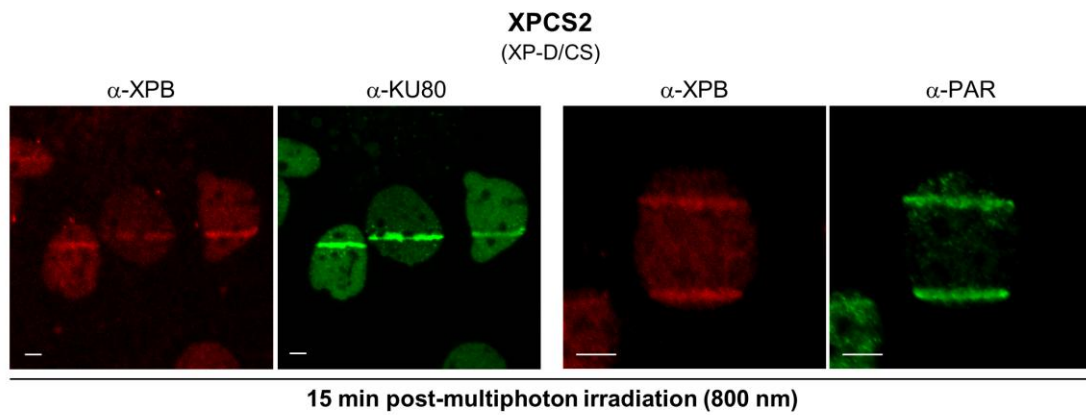

**A**

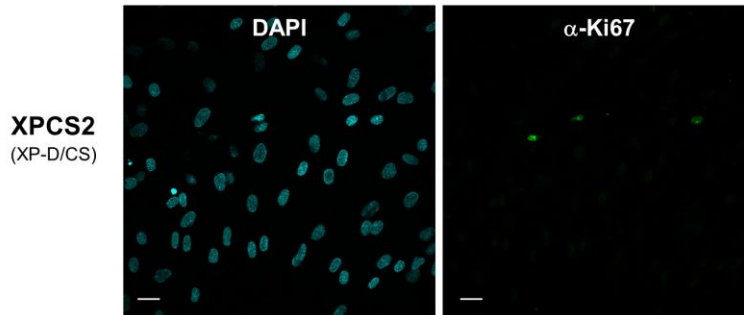

**B**

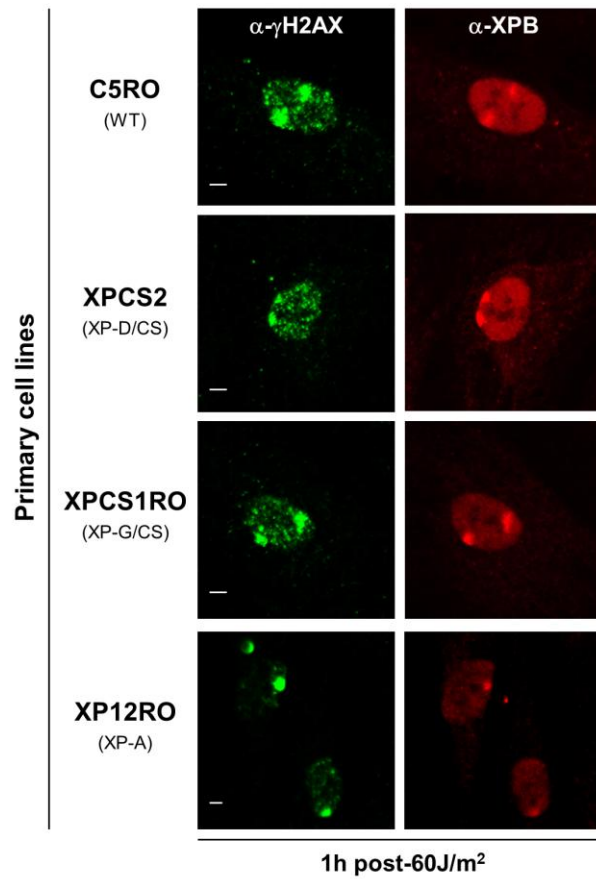

**A**

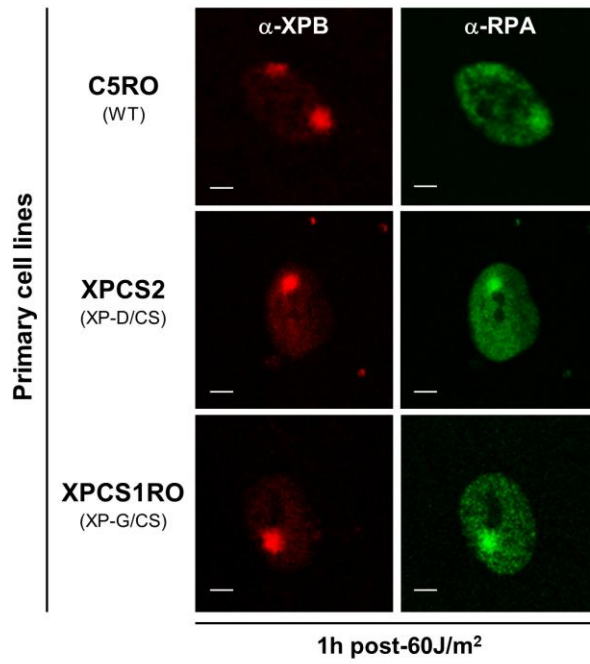

**B**

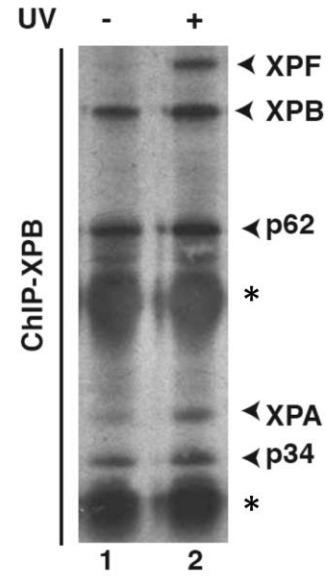

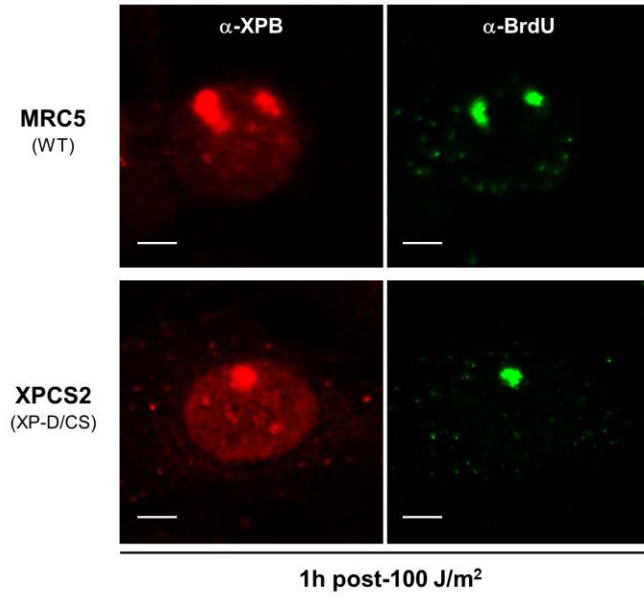

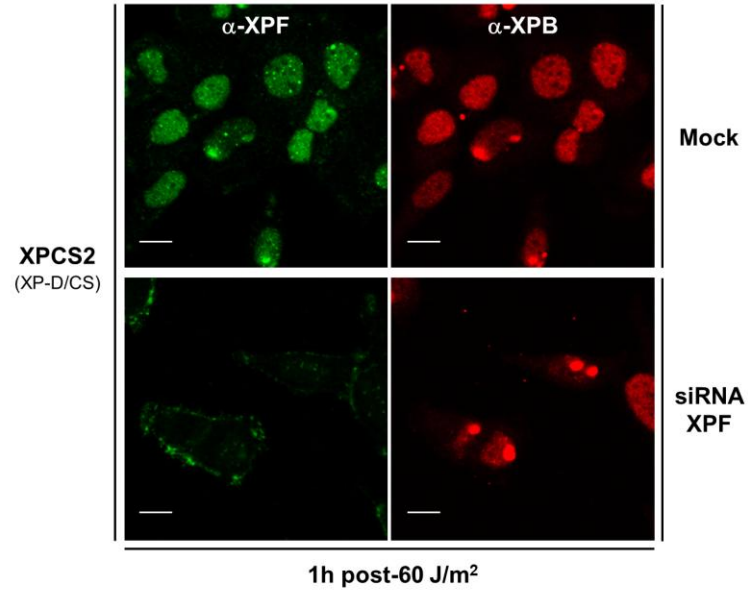

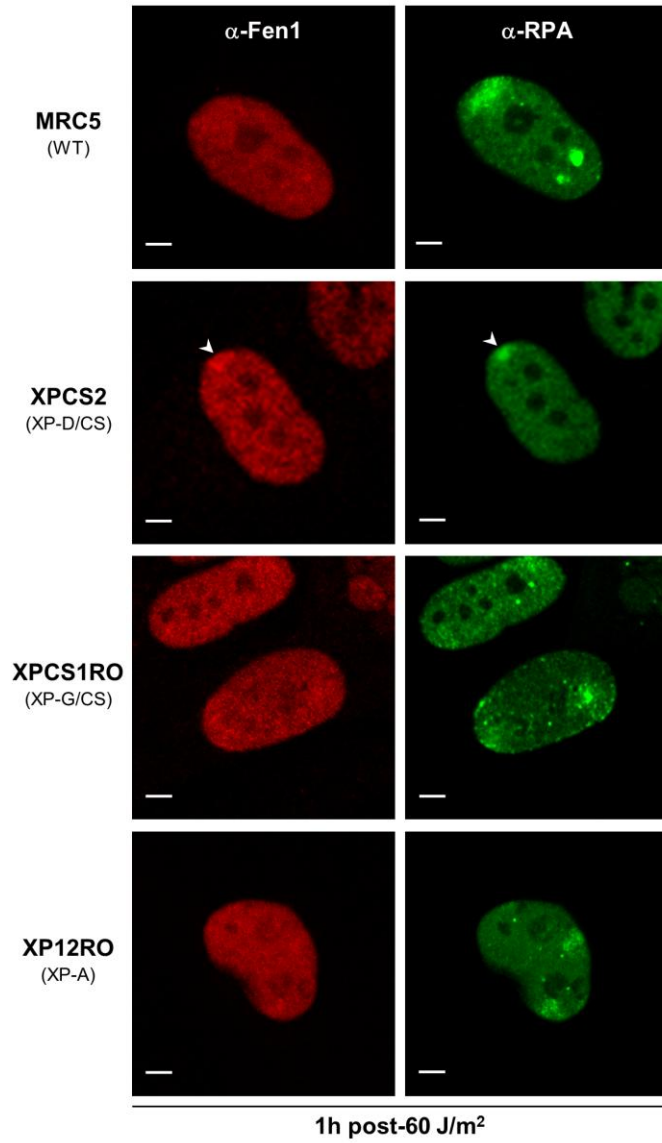

Supplement: emboj2012193s1.pdf [file emboj2012193s1.pdf]
